# Supplementary material
Source: publisher figshare collection journal article supplement (https://acs.figshare.com/ndownloader/files/3909253)
Supplement: Supplementary file 1 [file 3909253]

 
data_a_0ma 
  
_audit_creation_method            SHELXL-97 
_chemical_name_systematic 
; 
 ? 
; 
_chemical_name_common             ? 
_chemical_melting_point           ? 
_chemical_formula_moiety          ? 
_chemical_formula_sum 
 'C22 H26 N2 O4' 
_chemical_formula_weight          382.45 
  
loop_ 
 _atom_type_symbol 
 _atom_type_description 
 _atom_type_scat_dispersion_real 
 _atom_type_scat_dispersion_imag 
 _atom_type_scat_source 
 'C'  'C'   0.0181   0.0091 
 'International Tables Vol C Tables 4.2.6.8 and 6.1.1.4' 
 'H'  'H'   0.0000   0.0000 
 'International Tables Vol C Tables 4.2.6.8 and 6.1.1.4' 
 'N'  'N'   0.0311   0.0180 
 'International Tables Vol C Tables 4.2.6.8 and 6.1.1.4' 
 'O'  'O'   0.0492   0.0322 
 'International Tables Vol C Tables 4.2.6.8 and 6.1.1.4' 
  
_symmetry_cell_setting            Monoclinic 
_symmetry_space_group_name_H-M    P2(1)/c 
  
loop_ 
 _symmetry_equiv_pos_as_xyz 
 'x, y, z' 
 '-x, y+1/2, -z+1/2' 
 '-x, -y, -z' 
 'x, -y-1/2, z-1/2' 
  
_cell_length_a                    9.9180(4) 
_cell_length_b                    26.3168(9) 
_cell_length_c                    7.8796(3) 
_cell_angle_alpha                 90.00 
_cell_angle_beta                  97.924(2) 
_cell_angle_gamma                 90.00 
_cell_volume                      2037.02(13) 
_cell_formula_units_Z             4 
_cell_measurement_temperature     296(2) 
_cell_measurement_reflns_used     6638 
_cell_measurement_theta_min       3.36 
_cell_measurement_theta_max       66.95 
  
_exptl_crystal_description        ? 
_exptl_crystal_colour             colourless 
_exptl_crystal_size_max           0.19 
_exptl_crystal_size_mid           0.08 
_exptl_crystal_size_min           0.06 
_exptl_crystal_density_meas       ? 
_exptl_crystal_density_diffrn     1.247 
_exptl_crystal_density_method     'not measured' 
_exptl_crystal_F_000              816 
_exptl_absorpt_coefficient_mu     0.698 
_exptl_absorpt_correction_type    numerical 
_exptl_absorpt_correction_T_min   0.9059 
_exptl_absorpt_correction_T_max   1.0000 
_exptl_absorpt_process_details    'sadabs' 
  
_exptl_special_details 
; 
 ? 
; 
  
_diffrn_ambient_temperature       296(2) 
_diffrn_radiation_wavelength      1.54178 
_diffrn_radiation_type            CuK\a 
_diffrn_radiation_source          'fine-focus sealed tube' 
_diffrn_radiation_monochromator   graphite 
_diffrn_measurement_device_type   'Bruker APEX-II CCD' 
_diffrn_measurement_method        '\f and \w scans' 
_diffrn_detector_area_resol_mean  ? 
_diffrn_reflns_number             24263 
_diffrn_reflns_av_R_equivalents   0.0350 
_diffrn_reflns_av_sigmaI/netI     0.0239 
_diffrn_reflns_limit_h_min        -11 
_diffrn_reflns_limit_h_max        11 
_diffrn_reflns_limit_k_min        -31 
_diffrn_reflns_limit_k_max        31 
_diffrn_reflns_limit_l_min        -5 
_diffrn_reflns_limit_l_max        9 
_diffrn_reflns_theta_min          3.36 
_diffrn_reflns_theta_max          67.73 
_reflns_number_total              3657 
_reflns_number_gt                 3099 
_reflns_threshold_expression      >2sigma(I) 
  
_computing_data_collection        'Bruker APEX2' 
_computing_cell_refinement        'Bruker SAINT' 
_computing_data_reduction         'Bruker SAINT' 
_computing_structure_solution     'SHELXS-97 (Sheldrick, 2008)' 
_computing_structure_refinement   'SHELXL-97 (Sheldrick, 2008)' 
_computing_molecular_graphics     'Bruker SHELXTL' 
_computing_publication_material   'Bruker SHELXTL' 
  
_refine_special_details 
; 
 Refinement of F^2^ against ALL reflections.  The weighted R-factor wR and 
 goodness of fit S are based on F^2^, conventional R-factors R are based 
 on F, with F set to zero for negative F^2^. The threshold expression of 
 F^2^ > 2sigma(F^2^) is used only for calculating R-factors(gt) etc. and is 
 not relevant to the choice of reflections for refinement.  R-factors based 
 on F^2^ are statistically about twice as large as those based on F, and R- 
 factors based on ALL data will be even larger. 
; 
  
_refine_ls_structure_factor_coef  Fsqd 
_refine_ls_matrix_type            full 
_refine_ls_weighting_scheme       calc 
_refine_ls_weighting_details 
 'calc w=1/[\s^2^(Fo^2^)+(0.0702P)^2^+0.3735P] where P=(Fo^2^+2Fc^2^)/3' 
_atom_sites_solution_primary      direct 
_atom_sites_solution_secondary    difmap 
_atom_sites_solution_hydrogens    geom 
_refine_ls_hydrogen_treatment     mixed 
_refine_ls_extinction_method      none 
_refine_ls_extinction_coef        ? 
_refine_ls_number_reflns          3657 
_refine_ls_number_parameters      296 
_refine_ls_number_restraints      0 
_refine_ls_R_factor_all           0.0510 
_refine_ls_R_factor_gt            0.0438 
_refine_ls_wR_factor_ref          0.1273 
_refine_ls_wR_factor_gt           0.1193 
_refine_ls_goodness_of_fit_ref    1.032 
_refine_ls_restrained_S_all       1.032 
_refine_ls_shift/su_max           0.001 
_refine_ls_shift/su_mean          0.000 
  
loop_ 
 _atom_site_label 
 _atom_site_type_symbol 
 _atom_site_fract_x 
 _atom_site_fract_y 
 _atom_site_fract_z 
 _atom_site_U_iso_or_equiv 
 _atom_site_adp_type 
 _atom_site_occupancy 
 _atom_site_symmetry_multiplicity 
 _atom_site_calc_flag 
 _atom_site_refinement_flags 
 _atom_site_disorder_assembly 
 _atom_site_disorder_group 
O4 O 0.74739(11) 0.46777(4) 0.32914(15) 0.0590(3) Uani 1 1 d . . . 
N2 N 0.67138(14) 0.52360(5) 0.50287(18) 0.0525(3) Uani 1 1 d . . . 
O2 O 0.43875(12) 0.56611(4) 0.33831(14) 0.0611(3) Uani 1 1 d . . . 
O3 O 0.78188(15) 0.55231(5) 0.29010(17) 0.0728(4) Uani 1 1 d . . . 
C9 C 0.63638(15) 0.57381(5) 0.5535(2) 0.0474(3) Uani 1 1 d . . . 
N1 N 0.50104(14) 0.64582(5) 0.41951(17) 0.0556(3) Uani 1 1 d . . . 
C14 C 0.7917(4) 0.47284(10) 0.0316(3) 0.1122(10) Uani 1 1 d . . . 
H14A H 0.6960 0.4671 -0.0006 0.168 Uiso 1 1 calc R . . 
H14B H 0.8413 0.4569 -0.0502 0.168 Uiso 1 1 calc R . . 
H14C H 0.8095 0.5087 0.0339 0.168 Uiso 1 1 calc R . . 
C12 C 0.83555(16) 0.45088(6) 0.20512(19) 0.0543(4) Uani 1 1 d . . . 
C11 C 0.73735(15) 0.51744(6) 0.3666(2) 0.0524(4) Uani 1 1 d . . . 
C10 C 0.51538(15) 0.59450(6) 0.42885(18) 0.0485(3) Uani 1 1 d . . . 
C16 C 0.39769(19) 0.66773(7) 0.2873(2) 0.0653(5) Uani 1 1 d . . . 
H16A H 0.3817 0.6441 0.1920 0.078 Uiso 1 1 calc R . . 
H16B H 0.4336 0.6988 0.2450 0.078 Uiso 1 1 calc R . . 
C17 C 0.26420(18) 0.67930(6) 0.3484(2) 0.0602(4) Uani 1 1 d . . . 
C18 C 0.1569(2) 0.64579(8) 0.3183(2) 0.0701(5) Uani 1 1 d . . . 
H18 H 0.1688 0.6151 0.2640 0.084 Uiso 1 1 calc R . . 
C19 C 0.0317(2) 0.65710(10) 0.3677(3) 0.0872(6) Uani 1 1 d . . . 
H19 H -0.0405 0.6345 0.3444 0.105 Uiso 1 1 calc R . . 
C20 C 0.0147(3) 0.70190(12) 0.4512(3) 0.0981(8) Uani 1 1 d . . . 
H20 H -0.0694 0.7096 0.4844 0.118 Uiso 1 1 calc R . . 
C13 C 0.9808(2) 0.46394(11) 0.2774(4) 0.0990(8) Uani 1 1 d . . . 
H13A H 0.9927 0.5001 0.2763 0.148 Uiso 1 1 calc R . . 
H13B H 1.0420 0.4483 0.2088 0.148 Uiso 1 1 calc R . . 
H13C H 0.9999 0.4517 0.3930 0.148 Uiso 1 1 calc R . . 
C8 C 0.60813(17) 0.57347(6) 0.7380(2) 0.0524(4) Uani 1 1 d . . . 
C7 C 0.57871(17) 0.62653(6) 0.8039(2) 0.0543(4) Uani 1 1 d . . . 
C2 C 0.61569(15) 0.67097(5) 0.6967(2) 0.0515(4) Uani 1 1 d . . . 
C1 C 0.57751(17) 0.67991(6) 0.5334(2) 0.0563(4) Uani 1 1 d . . . 
C22 C 0.2447(2) 0.72416(8) 0.4337(3) 0.0864(7) Uani 1 1 d . . . 
H22 H 0.3160 0.7472 0.4563 0.104 Uiso 1 1 calc R . . 
C21 C 0.1198(3) 0.73508(11) 0.4857(3) 0.1058(10) Uani 1 1 d . . . 
H21 H 0.1080 0.7651 0.5441 0.127 Uiso 1 1 calc R . . 
C3 C 0.7046(2) 0.70438(6) 0.8219(2) 0.0632(4) Uani 1 1 d . . . 
C4 C 0.8366(2) 0.67573(7) 0.8671(3) 0.0696(5) Uani 1 1 d . . . 
C5 C 0.8091(2) 0.63777(8) 0.9648(2) 0.0701(5) Uani 1 1 d . . . 
C6 C 0.6608(2) 0.64237(7) 0.9797(2) 0.0696(5) Uani 1 1 d . . . 
O1 O 0.64202(17) 0.69693(5) 0.97423(18) 0.0829(4) Uani 1 1 d . . . 
C15 C 0.8170(2) 0.39387(7) 0.2012(3) 0.0690(5) Uani 1 1 d . . . 
H15A H 0.8370 0.3806 0.3153 0.104 Uiso 1 1 calc R . . 
H15B H 0.8775 0.3790 0.1300 0.104 Uiso 1 1 calc R . . 
H15C H 0.7246 0.3858 0.1557 0.104 Uiso 1 1 calc R . . 
H2N H 0.6395(18) 0.4984(7) 0.548(2) 0.052(4) Uiso 1 1 d . . . 
H1 H 0.594(2) 0.7102(8) 0.482(2) 0.071(5) Uiso 1 1 d . . . 
H3 H 0.7075(19) 0.7421(8) 0.791(2) 0.072(5) Uiso 1 1 d . . . 
H5 H 0.863(2) 0.6090(9) 1.013(3) 0.094(7) Uiso 1 1 d . . . 
H4 H 0.923(3) 0.6832(9) 0.815(3) 0.099(7) Uiso 1 1 d . . . 
H6 H 0.630(2) 0.6275(8) 1.079(3) 0.079(6) Uiso 1 1 d . . . 
H7 H 0.483(2) 0.6295(7) 0.814(3) 0.075(6) Uiso 1 1 d . . . 
H8A H 0.690(2) 0.5581(7) 0.805(2) 0.066(5) Uiso 1 1 d . . . 
H8B H 0.5288(19) 0.5508(7) 0.750(2) 0.060(5) Uiso 1 1 d . . . 
H9 H 0.7127(16) 0.5963(6) 0.5470(19) 0.047(4) Uiso 1 1 d . . . 
  
loop_ 
 _atom_site_aniso_label 
 _atom_site_aniso_U_11 
 _atom_site_aniso_U_22 
 _atom_site_aniso_U_33 
 _atom_site_aniso_U_23 
 _atom_site_aniso_U_13 
 _atom_site_aniso_U_12 
O4 0.0609(7) 0.0445(6) 0.0764(7) 0.0024(5) 0.0267(5) 0.0043(5) 
N2 0.0554(7) 0.0353(6) 0.0691(8) 0.0043(6) 0.0160(6) -0.0003(5) 
O2 0.0673(7) 0.0523(6) 0.0601(6) 0.0008(5) -0.0042(5) -0.0071(5) 
O3 0.0912(9) 0.0504(7) 0.0816(8) 0.0093(6) 0.0291(7) -0.0068(6) 
C9 0.0453(8) 0.0352(7) 0.0615(8) 0.0032(6) 0.0061(6) -0.0028(6) 
N1 0.0606(8) 0.0414(7) 0.0621(8) 0.0104(5) -0.0019(6) 0.0012(6) 
C14 0.194(3) 0.0799(15) 0.0575(11) 0.0073(10) -0.0013(14) 0.0107(17) 
C12 0.0555(9) 0.0585(9) 0.0503(8) -0.0012(6) 0.0116(6) 0.0013(7) 
C11 0.0487(8) 0.0427(8) 0.0658(9) 0.0051(7) 0.0074(7) 0.0011(6) 
C10 0.0519(8) 0.0415(8) 0.0523(8) 0.0046(6) 0.0076(6) -0.0030(6) 
C16 0.0766(11) 0.0568(10) 0.0590(9) 0.0153(7) -0.0028(8) 0.0087(8) 
C17 0.0744(11) 0.0531(9) 0.0470(8) 0.0035(7) -0.0129(7) 0.0151(8) 
C18 0.0835(13) 0.0670(11) 0.0565(9) 0.0002(8) -0.0018(8) 0.0044(9) 
C19 0.0790(14) 0.1113(18) 0.0673(12) 0.0153(12) -0.0041(10) 0.0026(12) 
C20 0.0911(16) 0.133(2) 0.0650(12) 0.0041(13) -0.0062(11) 0.0461(16) 
C13 0.0564(11) 0.117(2) 0.1269(19) -0.0466(16) 0.0237(12) -0.0061(11) 
C8 0.0585(9) 0.0393(8) 0.0570(9) 0.0058(6) 0.0002(7) -0.0044(7) 
C7 0.0502(8) 0.0461(8) 0.0690(10) 0.0040(7) 0.0168(7) 0.0019(6) 
C2 0.0509(8) 0.0363(7) 0.0679(9) -0.0002(6) 0.0101(7) 0.0020(6) 
C1 0.0601(9) 0.0338(7) 0.0743(10) 0.0100(7) 0.0068(8) -0.0005(6) 
C22 0.0917(15) 0.0685(12) 0.0870(13) -0.0191(10) -0.0308(11) 0.0261(11) 
C21 0.119(2) 0.1083(19) 0.0790(14) -0.0269(13) -0.0246(14) 0.0612(17) 
C3 0.0773(11) 0.0410(9) 0.0723(10) -0.0098(7) 0.0137(8) -0.0026(8) 
C4 0.0649(11) 0.0599(11) 0.0802(12) -0.0171(9) -0.0035(9) -0.0090(8) 
C5 0.0801(13) 0.0594(11) 0.0646(10) -0.0135(8) -0.0117(9) 0.0030(9) 
C6 0.1023(15) 0.0531(10) 0.0574(10) -0.0064(8) 0.0257(9) 0.0045(9) 
O1 0.1195(12) 0.0542(8) 0.0817(9) -0.0178(6) 0.0375(8) 0.0099(7) 
C15 0.0739(11) 0.0596(11) 0.0764(11) -0.0044(8) 0.0209(9) 0.0113(9) 
  
_geom_special_details 
; 
 All esds (except the esd in the dihedral angle between two l.s. planes) 
 are estimated using the full covariance matrix.  The cell esds are taken 
 into account individually in the estimation of esds in distances, angles 
 and torsion angles; correlations between esds in cell parameters are only 
 used when they are defined by crystal symmetry.  An approximate (isotropic) 
 treatment of cell esds is used for estimating esds involving l.s. planes. 
; 
  
loop_ 
 _geom_bond_atom_site_label_1 
 _geom_bond_atom_site_label_2 
 _geom_bond_distance 
 _geom_bond_site_symmetry_2 
 _geom_bond_publ_flag 
O4 C11 1.3466(18) . ? 
O4 C12 1.4672(18) . ? 
N2 C11 1.342(2) . ? 
N2 C9 1.4366(19) . ? 
N2 H2N 0.836(18) . ? 
O2 C10 1.2229(18) . ? 
O3 C11 1.2141(19) . ? 
C9 C8 1.518(2) . ? 
C9 C10 1.542(2) . ? 
C9 H9 0.968(16) . ? 
N1 C10 1.359(2) . ? 
N1 C1 1.413(2) . ? 
N1 C16 1.475(2) . ? 
C14 C12 1.493(3) . ? 
C14 H14A 0.9600 . ? 
C14 H14B 0.9600 . ? 
C14 H14C 0.9600 . ? 
C12 C15 1.511(2) . ? 
C12 C13 1.514(3) . ? 
C16 C17 1.501(3) . ? 
C16 H16A 0.9700 . ? 
C16 H16B 0.9700 . ? 
C17 C18 1.377(3) . ? 
C17 C22 1.385(3) . ? 
C18 C19 1.384(3) . ? 
C18 H18 0.9300 . ? 
C19 C20 1.372(4) . ? 
C19 H19 0.9300 . ? 
C20 C21 1.358(4) . ? 
C20 H20 0.9300 . ? 
C13 H13A 0.9600 . ? 
C13 H13B 0.9600 . ? 
C13 H13C 0.9600 . ? 
C8 C7 1.532(2) . ? 
C8 H8A 0.99(2) . ? 
C8 H8B 1.001(19) . ? 
C7 C2 1.517(2) . ? 
C7 C6 1.564(3) . ? 
C7 H7 0.97(2) . ? 
C2 C1 1.312(2) . ? 
C2 C3 1.511(2) . ? 
C1 H1 0.92(2) . ? 
C22 C21 1.387(4) . ? 
C22 H22 0.9300 . ? 
C21 H21 0.9300 . ? 
C3 O1 1.439(2) . ? 
C3 C4 1.510(3) . ? 
C3 H3 1.02(2) . ? 
C4 C5 1.312(3) . ? 
C4 H4 1.02(3) . ? 
C5 C6 1.497(3) . ? 
C5 H5 0.97(2) . ? 
C6 O1 1.448(2) . ? 
C6 H6 0.96(2) . ? 
C15 H15A 0.9600 . ? 
C15 H15B 0.9600 . ? 
C15 H15C 0.9600 . ? 
  
loop_ 
 _geom_angle_atom_site_label_1 
 _geom_angle_atom_site_label_2 
 _geom_angle_atom_site_label_3 
 _geom_angle 
 _geom_angle_site_symmetry_1 
 _geom_angle_site_symmetry_3 
 _geom_angle_publ_flag 
C11 O4 C12 120.59(12) . . ? 
C11 N2 C9 119.77(13) . . ? 
C11 N2 H2N 120.0(12) . . ? 
C9 N2 H2N 119.5(12) . . ? 
N2 C9 C8 110.13(12) . . ? 
N2 C9 C10 110.16(12) . . ? 
C8 C9 C10 112.46(13) . . ? 
N2 C9 H9 109.1(9) . . ? 
C8 C9 H9 107.7(9) . . ? 
C10 C9 H9 107.2(9) . . ? 
C10 N1 C1 123.60(13) . . ? 
C10 N1 C16 118.96(14) . . ? 
C1 N1 C16 117.42(13) . . ? 
C12 C14 H14A 109.5 . . ? 
C12 C14 H14B 109.5 . . ? 
H14A C14 H14B 109.5 . . ? 
C12 C14 H14C 109.5 . . ? 
H14A C14 H14C 109.5 . . ? 
H14B C14 H14C 109.5 . . ? 
O4 C12 C14 111.56(17) . . ? 
O4 C12 C15 103.44(12) . . ? 
C14 C12 C15 110.24(16) . . ? 
O4 C12 C13 107.72(14) . . ? 
C14 C12 C13 113.5(2) . . ? 
C15 C12 C13 109.87(17) . . ? 
O3 C11 N2 123.82(15) . . ? 
O3 C11 O4 125.60(15) . . ? 
N2 C11 O4 110.58(13) . . ? 
O2 C10 N1 121.58(14) . . ? 
O2 C10 C9 121.49(13) . . ? 
N1 C10 C9 116.88(13) . . ? 
N1 C16 C17 114.23(14) . . ? 
N1 C16 H16A 108.7 . . ? 
C17 C16 H16A 108.7 . . ? 
N1 C16 H16B 108.7 . . ? 
C17 C16 H16B 108.7 . . ? 
H16A C16 H16B 107.6 . . ? 
C18 C17 C22 118.2(2) . . ? 
C18 C17 C16 120.63(16) . . ? 
C22 C17 C16 121.13(19) . . ? 
C17 C18 C19 121.1(2) . . ? 
C17 C18 H18 119.5 . . ? 
C19 C18 H18 119.5 . . ? 
C20 C19 C18 119.6(2) . . ? 
C20 C19 H19 120.2 . . ? 
C18 C19 H19 120.2 . . ? 
C21 C20 C19 120.5(2) . . ? 
C21 C20 H20 119.8 . . ? 
C19 C20 H20 119.8 . . ? 
C12 C13 H13A 109.5 . . ? 
C12 C13 H13B 109.5 . . ? 
H13A C13 H13B 109.5 . . ? 
C12 C13 H13C 109.5 . . ? 
H13A C13 H13C 109.5 . . ? 
H13B C13 H13C 109.5 . . ? 
C9 C8 C7 112.84(12) . . ? 
C9 C8 H8A 105.6(11) . . ? 
C7 C8 H8A 111.7(11) . . ? 
C9 C8 H8B 109.9(10) . . ? 
C7 C8 H8B 108.9(10) . . ? 
H8A C8 H8B 107.7(15) . . ? 
C2 C7 C8 116.24(13) . . ? 
C2 C7 C6 98.71(13) . . ? 
C8 C7 C6 116.29(14) . . ? 
C2 C7 H7 107.5(12) . . ? 
C8 C7 H7 109.8(12) . . ? 
C6 C7 H7 107.4(12) . . ? 
C1 C2 C3 126.83(15) . . ? 
C1 C2 C7 128.70(15) . . ? 
C3 C2 C7 104.44(14) . . ? 
C2 C1 N1 124.48(14) . . ? 
C2 C1 H1 123.0(12) . . ? 
N1 C1 H1 112.4(12) . . ? 
C17 C22 C21 120.7(2) . . ? 
C17 C22 H22 119.7 . . ? 
C21 C22 H22 119.7 . . ? 
C20 C21 C22 120.0(2) . . ? 
C20 C21 H21 120.0 . . ? 
C22 C21 H21 120.0 . . ? 
O1 C3 C4 101.23(16) . . ? 
O1 C3 C2 100.66(14) . . ? 
C4 C3 C2 105.80(13) . . ? 
O1 C3 H3 111.0(11) . . ? 
C4 C3 H3 119.3(11) . . ? 
C2 C3 H3 116.4(11) . . ? 
C5 C4 C3 105.95(18) . . ? 
C5 C4 H4 129.5(14) . . ? 
C3 C4 H4 124.0(14) . . ? 
C4 C5 C6 105.71(18) . . ? 
C4 C5 H5 132.3(15) . . ? 
C6 C5 H5 121.7(15) . . ? 
O1 C6 C5 101.63(16) . . ? 
O1 C6 C7 100.88(15) . . ? 
C5 C6 C7 107.82(14) . . ? 
O1 C6 H6 111.9(12) . . ? 
C5 C6 H6 117.0(13) . . ? 
C7 C6 H6 115.5(13) . . ? 
C3 O1 C6 95.26(12) . . ? 
C12 C15 H15A 109.5 . . ? 
C12 C15 H15B 109.5 . . ? 
H15A C15 H15B 109.5 . . ? 
C12 C15 H15C 109.5 . . ? 
H15A C15 H15C 109.5 . . ? 
H15B C15 H15C 109.5 . . ? 
  
_diffrn_measured_fraction_theta_max    0.991 
_diffrn_reflns_theta_full              67.73 
_diffrn_measured_fraction_theta_full   0.991 
_refine_diff_density_max    0.224 
_refine_diff_density_min   -0.206 
_refine_diff_density_rms    0.034 
